# Supplementary material
Source: Springer Nature journal article supplement (https://www.springermedizin.de/resource/supplementary/12931_2010_1062_MOESM2_ESM.pdf/9425554)

% of  
Subjects  
with  
Change

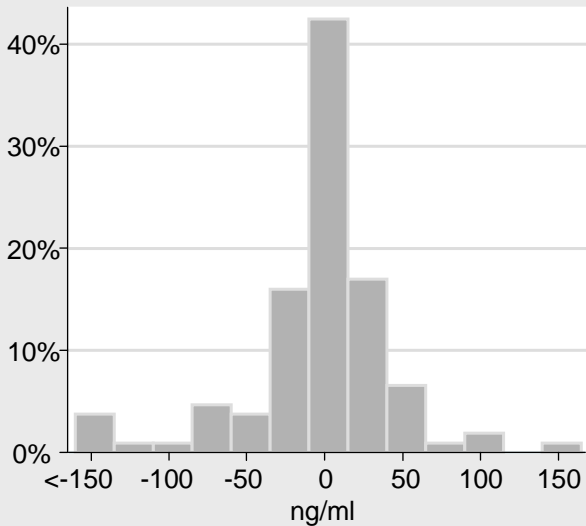

Supplement: MOESM2 [file 9425554]
